# Supplementary material
Source: Springer Nature journal article supplement (https://www.springermedizin.de/resource/supplementary/13063_2014_2128_MOESM1_ESM.pdf/9621336)
Supplement: MOESM1 [file 9621336]

Pre-trial

MDT recommendation that patient is potentially eligible for the study

Patient is entered onto a register as potentially eligible for study

Patient undergoes chemotherapy as recommended by MDT

MDT confirms patient remains potentially eligible for the study

Patient sent information for audio-recording & clinic appointment

In clinic, eligibility criteria assessed, trial explained & information provided

Patients consenting to randomisation provide written consent

Randomise in Bristol to 3 arm trial  
Randomise in Plymouth into 2 arm trial

Open gastric mobilisation & right thoracotomy

Laparoscopic gastric mobilisation & right thoracotomy

Totally minimally invasive surgery

Trial procedures
